# Supplementary material
Source: PubMed Central journal article supplement (PMC5728469)
Supplement: ba008284-suppl1.pdf [file ba008284-suppl1.pdf]

## A 4-lncRNA Scoring System for Prognostication of Adult Myelodysplastic Syndromes

### Supplementary Information

#### Methodology used to externally validate the 4-lncRNA score

First, as in the training set, we used the Robust Multichip Average (RMA) algorithm for microarray pre-processing and normalization. Then we used the mean and standard deviation (of each of the four lncRNAs) we derived from the training set to "Z-transform" (i.e., each expression value underwent subtraction of sample mean derived from the 176 training-set patients, followed by division by sample standard deviation derived from the 176 training-set patients) of each the four lncRNA probes, namely TC07000551.hg.1, TC08000489.hg.1, TC02004770.hg.1, and TC03000701.hg.1.

Then we used the Z-transformed expression values to calculate the lncRNA score in the validation set with the formula we derived from the training set: lncRNA risk score = [TC07000551.hg.1] x 0.578 + [TC08000489.hg.1] x 0.526 + [TC02004770.hg.1] x 0.289 + [TC03000701.hg.1] x 0.183. We then used the median of the composite lncRNA scores of the training set as the threshold for assigning patients into either high-score or low-score subgroups. And therefore, in the end, of the 30 MDS patients in the validation cohort, 19 belonged to high-score subgroup, while 11 belonged to the low-score subgroup. Subsequently K-M analyses of survival and AML transformation were performed on these two subgroups.

A list of the relevant parameters used for the detailed calculation are tabulated in Supplementary Table S1.

#### Supplementary Table S1. Pertinent lncRNA statistics in the training set (N=176)

| Parameter                  | RNA accession              | Range         | Mean   | S.D.  |
|----------------------------|----------------------------|---------------|--------|-------|
| TC07000551.hg.1            | ENST00000419668            | 4.757 ~ 9.657 | 6.286  | 0.901 |
| TC08000489.hg.1            | OTTHUMT00000379034         | 3.493 ~ 6.298 | 4.325  | 0.380 |
| TC02004770.hg.1            | TCONS_00002678-XLOC_002452 | 4.201 ~ 5.445 | 4.699  | 0.226 |
| TC03000701.hg.1            | OTTHUMT00000358308         | 3.990 ~ 6.531 | 4.725  | 0.398 |
| <b>4-lncRNA risk score</b> |                            | -1.857~5.149  | -0.124 | 1.035 |

**Supplementary Table S2. List of the 30 lncRNAs with significant association ( $P < 1 \times 10^{-6}$ ) with overall survival in the univariate Cox proportional regression model**

| Probe Set ID    | RNA Accession              | RNA Source        | Hazard Ratio |
|-----------------|----------------------------|-------------------|--------------|
| TC07000168.hg.1 | ENST00000519694            | ENSEMBL           | 1.938        |
| TC07000551.hg.1 | ENST00000419668            | ENSEMBL           | 2.049        |
| TC10000155.hg.1 | NR_038921                  | RefSeq            | 1.777        |
| TC03000698.hg.1 | NR_037893                  | RefSeq            | 1.725        |
| TC06003705.hg.1 | uc003pes.1                 | NONCODE           | 1.583        |
| TC12000583.hg.1 | ENST00000545709            | ENSEMBL           | 1.967        |
| TC01004990.hg.1 | TCONS_00001254-XLOC_000542 | Rinn lincRNA      | 1.812        |
| TC13001319.hg.1 | NR_044995                  | NONCODE           | 1.752        |
| TC14000683.hg.1 | ENST00000554693            | ENSEMBL           | 1.711        |
| TC03002398.hg.1 | TCONS_00006099-XLOC_002710 | Rinn lincRNA      | 1.666        |
| TC10002501.hg.1 | TCONS_00018450-XLOC_008747 | Rinn lincRNA      | 1.675        |
| TC03000701.hg.1 | OTTHUMT00000358308         | Havana transcript | 1.699        |
| TC02004770.hg.1 | TCONS_00002678-XLOC_002452 | Rinn lincRNA      | 1.73         |
| TC02003715.hg.1 | ENST00000415236            | NONCODE           | 1.781        |
| TC16001489.hg.1 | ENST00000457283            | NONCODE           | 1.765        |
| TC15002805.hg.1 | NR_026858                  | RefSeq            | 1.822        |
| TC08000699.hg.1 | OTTHUMT00000381603         | Havana transcript | 1.701        |
| TC09001544.hg.1 | OTTHUMT00000053876         | Havana transcript | 1.744        |
| TC13000470.hg.1 | ENST00000411525            | ENSEMBL           | 1.696        |
| TC08000489.hg.1 | OTTHUMT00000379034         | Havana transcript | 1.702        |
| TC02001072.hg.1 | ENST00000436616            | ENSEMBL           | 1.739        |
| TC02002657.hg.1 | NR_034096                  | RefSeq            | 1.669        |
| TC14000928.hg.1 | ENST00000535351            | ENSEMBL           | 1.595        |
| TC15002771.hg.1 | NR_040057                  | RefSeq            | 1.581        |
| TC14000659.hg.1 | NR_024149                  | RefSeq            | 1.576        |
| TC09001836.hg.1 | uc003zmg.2                 | NONCODE           | 1.664        |
| TC21000243.hg.1 | NR_026943                  | RefSeq            | 1.723        |
| TC06002878.hg.1 | ENST00000438676            | NONCODE           | 1.738        |
| TC02003490.hg.1 | ENST00000336905            | NONCODE           | 1.556        |
| TC19002464.hg.1 | NR_038279                  | NONCODE           | 1.538        |

**Supplementary Table S3. Detailed information of the four lncRNAs used to construct the lncRNA risk score**

| Probe Set ID    | RNA Accession      | RNA Source        | Chromosome Locus             | Transcript Length |
|-----------------|--------------------|-------------------|------------------------------|-------------------|
| TC07000551.hg.1 | ENST00000419668    | ENSEMBL           | chr7:92,484,223-92,546,488   | 527 bp            |
| TC08000489.hg.1 | OTTHUMT00000379034 | Havana transcript | chr8:74,964,575-75,012,088   | 738 bp            |
| TC02004770.hg.1 | TCONS_00002678     | Rinn lncRNA       | chr2:200,625,267-200,715,896 | 944 bp            |
| TC03000701.hg.1 | OTTHUMT00000358308 | Havana transcript | chr3:129,831,393-129,838,017 | 569 bp            |

Reference Genome: Human GRCh37/hg19

**Supplementary Table S4. Comparison of cytogenetic changes between patients with low and high lncRNA scores**

| <b>Variables</b>                          | <b>Total<sup>a</sup></b> | <b>Low lncRNA score (n=78)<sup>a</sup></b> | <b>High lncRNA score (n=86)<sup>a</sup></b> | <b>P value</b> |
|-------------------------------------------|--------------------------|--------------------------------------------|---------------------------------------------|----------------|
| <b>Good karyotype<sup>b</sup></b>         | 110                      | 60 (76.9%)                                 | 50 (58.1%)                                  | 0.013*         |
| <b>Intermediate karyotype<sup>b</sup></b> | 29                       | 11 (14.1%)                                 | 18 (20.9%)                                  | 0.307          |
| <b>Poor karyotype<sup>b</sup></b>         | 25                       | 7 (9.0%)                                   | 18 (20.9%)                                  | 0.049*         |
| <b>Normal karyotype</b>                   | 100                      | 54 (69.2%)                                 | 46 (53.5%)                                  | 0.054          |
| <b>Any karyotype abnormality</b>          | 64                       | 24 (30.8%)                                 | 40 (46.5%)                                  | 0.054          |
| <b>Loss Y<sup>c</sup></b>                 | 3                        | 2 (2.6%)                                   | 1 (1.2%)                                    | 0.605          |
| <b>Del 20q<sup>c</sup></b>                | 5                        | 3 (3.8%)                                   | 2 (2.3%)                                    | 0.669          |
| <b>Del 5q<sup>c</sup></b>                 | 2                        | 1 (1.3%)                                   | 1 (1.2%)                                    | >0.999         |
| <b>Trisomy 8<sup>c</sup></b>              | 7                        | 2 (2.6%)                                   | 5 (5.8%)                                    | 0.447          |
| <b>Monosomy 7<sup>c</sup></b>             | 4                        | 1 (1.3%)                                   | 3 (3.5%)                                    | 0.662          |
| <b>Complex karyotype</b>                  | 18                       | 4 (5.1%)                                   | 14 (16.3%)                                  | 0.026*         |
| <b>Other abnormalities</b>                | 25                       | 11 (14.1%)                                 | 14 (16.3%)                                  | 0.828          |

<sup>a</sup>Cytogenetic data at diagnosis were available in 164 patients, including 78 with low lncRNA scores and 86 with high lncRNA scores

<sup>b</sup>Good, normal karyotype, isolated -Y, del(5q) or del(20q); Poor, complex ( $\geq 3$  abnormalities) or chromosome 7 anomalies; Intermediate, other abnormalities.

<sup>c</sup>As the sole abnormality.

**Supplementary Table S5. Comparison of clinical and laboratory features between the training cohort and the validation cohort**

| Clinical characters                 | Training cohort<br>(n=176) | Validation cohort<br>(n=30) | P value |
|-------------------------------------|----------------------------|-----------------------------|---------|
| <b>Sex</b>                          |                            |                             | 0.400   |
| Male                                | 121 (68.8%)                | 18 (60.0%)                  |         |
| Female                              | 55 (31.3%)                 | 12 (40.0%)                  |         |
| <b>Age (year)<sup>a</sup></b>       | 67.8 (18.5-94.5)           | 68.3 (34.5-91.8)            | 0.811   |
| <b>Laboratory data<sup>a</sup></b>  |                            |                             |         |
| WBC (/μL)                           | 3825 (490-20440)           | 3630 (1030-19740)           | 0.526   |
| ANC (/μL)                           | 1768 (103-12728)           | 1631 (215-15397)            | 0.299   |
| Hb (g/dL)                           | 8.1 (3.5-14.6)             | 8.1 (5.8-11.5)              | 0.633   |
| Platelet (×1,000 /μL)               | 86 (3-721)                 | 54 (1-376)                  | 0.174   |
| BM blast (%)                        | 3.0 (0-18.8)               | 6.8 (0.5-17.0)              | 0.185   |
| <b>2008 WHO classification</b>      |                            |                             |         |
| RCUD                                | 42 (23.9%)                 | 6 (20.0%)                   | 0.816   |
| RARS                                | 13 (7.4%)                  | 4 (13.3%)                   | 0.282   |
| RCMD                                | 36 (20.5%)                 | 4 (13.3%)                   | 0.460   |
| RCMD-RS                             | 9 (5.1%)                   | 0 (0%)                      | 0.362   |
| RAEB1                               | 32 (18.2%)                 | 7 (23.3%)                   | 0.462   |
| RAEB2                               | 44 (25.0%)                 | 9 (30.0%)                   | 0.652   |
| <b>Cytogenetic risk<sup>b</sup></b> |                            |                             |         |
| NK                                  | 100 (61.0%)                | 18 (62.1%)                  | >0.999  |
| Complex karyotype                   | 18 (11.0%)                 | 7 (24.1%)                   | 0.069   |
| <b>IPSS-R<sup>b,c</sup></b>         |                            |                             |         |
| Very low                            | 6 (3.7%)                   | 0 (0%)                      | 0.594   |
| Low                                 | 54 (32.9%)                 | 4 (13.8%)                   | 0.047*  |
| INT                                 | 41 (25.0%)                 | 6 (20.7%)                   | 0.815   |
| High                                | 35 (21.3%)                 | 10 (34.5%)                  | 0.152   |
| Very high                           | 28 (17.1%)                 | 9 (31.0%)                   | 0.121   |

<sup>a</sup>Median (range).

<sup>b</sup>164 patients in the training cohort, and 29 patients in the validation cohort, had chromosome data at diagnosis.

<sup>c</sup>IPSS-R: Very low, ≤1.5; Low, >1.5-3; intermediate (INT), >3-4.5; High, >4.5-6; and Very high, >6.

\*P value < 0.05

Abbreviations: FAB, French-American-British classification; RARS, refractory anemia with ring sideroblasts; RAEB, refractory anemia with excess blasts; RCUD, refractory cytopenia with unilineage dysplasia; RCMD, refractory cytopenia with multilineage dysplasia; IPSS-R, revised international prognosis scoring system.

**Supplementary Table S6. Univariate analysis (Cox regression) of the impact of different variables on the overall survival in the 176 MDS patients**

| <b>Variable</b>              | <b>Hazard ratio</b> | <b>Lower 95% CI</b> | <b>Upper 95% CI</b> | <b>P value</b> |
|------------------------------|---------------------|---------------------|---------------------|----------------|
| <b>Age<sup>a</sup></b>       | 1.019               | 1.005               | 1.033               | 0.007          |
| <b>WBC<sup>b</sup></b>       | 1.000               | 1.000               | 1.000               | 0.117          |
| <b>Karyotype<sup>c</sup></b> | 2.171               | 1.253               | 3.760               | 0.006          |
| <b>IPSS-R</b>                | 1.757               | 1.454               | 2.122               | <0.001         |
| <b>FLT3/ITD</b>              | 1.930               | 0.267               | 13.944              | 0.515          |
| <b>NRAS/ KRAS</b>            | 1.553               | 0.565               | 4.270               | 0.394          |
| <b>RUNX1</b>                 | 1.553               | 0.836               | 2.883               | 0.163          |
| <b>MLL/PTD</b>               | 1.341               | 0.186               | 9.677               | 0.771          |
| <b>IDH1/2</b>                | 1.579               | 0.385               | 6.471               | 0.526          |
| <b>ASXL1</b>                 | 1.961               | 1.205               | 3.190               | 0.007          |
| <b>TET2</b>                  | 1.336               | 0.722               | 2.472               | 0.356          |
| <b>DNMT3A</b>                | 1.307               | 0.721               | 2.367               | 0.378          |
| <b>TP53</b>                  | 10.073              | 4.794               | 21.165              | <0.001         |
| <b>SETBP1</b>                | 1.853               | 0.583               | 5.888               | 0.295          |
| <b>EZH2</b>                  | 1.931               | 0.888               | 4.200               | 0.097          |
| <b>SF3B1</b>                 | 0.720               | 0.397               | 1.307               | 0.281          |
| <b>U2AF1</b>                 | 1.044               | 0.503               | 2.169               | 0.908          |
| <b>SRSF2</b>                 | 1.886               | 1.055               | 3.371               | 0.032          |
| <b>ZRSR2</b>                 | 2.646               | 1.409               | 4.970               | 0.002          |

<sup>a</sup> Age as a continuous variable

<sup>b</sup> WBC as a continuous variable

<sup>c</sup> Unfavorable cytogenetics versus others. Patients without chromosome data were not included in the analysis.

**Supplementary Table S7. The 255 genes differentially expressed between patients with the highest (>average +1 SD, n=22) and the lowest (< average - 1 SD, n=22) lncRNA risk scores.**

| No. | Gene symbol | Fold change | Parametric P value | FDR        |
|-----|-------------|-------------|--------------------|------------|
| 1   | KIT         | 9.058       | < 1.00E-07         | < 1e-07    |
| 2   | CD34        | 8.731       | < 1.00E-07         | < 1.00E-07 |
| 3   | FLT3        | 6.951       | 2.00E-07           | 0.000162   |
| 4   | PROM1       | 6.765       | < 1.00E-07         | < 1.00E-07 |
| 5   | PRSS57      | 6.047       | 3.00E-07           | 0.000193   |
| 6   | SOX4        | 5.142       | < 1.00E-07         | < 1.00E-07 |
| 7   | CPA3        | 4.937       | 3.82E-05           | 0.00339    |
| 8   | OCLN        | 4.750       | 8.53E-05           | 0.00557    |
| 9   | CFD         | 4.313       | 5.93E-05           | 0.00449    |
| 10  | ANGPT1      | 4.090       | 5.09E-05           | 0.00404    |
| 11  | HPGDS       | 3.468       | 0.000104           | 0.00613    |
| 12  | CYTL1       | 3.423       | 1.70E-05           | 0.00214    |
| 13  | CPXM1       | 3.387       | < 1.00E-07         | 0.00011    |
| 14  | MYB         | 3.231       | 2.34E-05           | 0.00252    |
| 15  | IGSF10      | 3.154       | 1.50E-06           | 0.000518   |
| 16  | MGST1       | 3.144       | 2.00E-07           | 0.000162   |
| 17  | WDR49       | 3.087       | 3.40E-06           | 0.000792   |
| 18  | NPR3        | 3.068       | 0.000266           | 0.00991    |
| 19  | ERLIN1      | 3.060       | 8.22E-05           | 0.00545    |
| 20  | EMP1        | 3.022       | 0.000485           | 0.014      |
| 21  | SMIM24      | 3.016       | 2.60E-06           | 0.000683   |
| 22  | ZNF521      | 2.914       | 6.87E-05           | 0.005      |
| 23  | MAMDC2      | 2.888       | 0.000162           | 0.00764    |
| 24  | HGF         | 2.886       | 0.000168           | 0.0077     |
| 25  | HIST2H4B    | 2.857       | 1.39E-05           | 0.00195    |
| 26  | HOXA5       | 2.768       | 0.000209           | 0.00867    |
| 27  | MYO5C       | 2.577       | < 1.00E-07         | < 1.00E-07 |
| 28  | MSRB3       | 2.572       | 3.20E-06           | 0.000775   |
| 29  | TM4SF1      | 2.571       | 3.92E-05           | 0.00345    |
| 30  | CDK6        | 2.570       | 5.00E-07           | 0.000291   |
| 31  | ITGA5       | 2.554       | 4.05E-05           | 0.00349    |
| 32  | JAG1        | 2.548       | 1.42E-05           | 0.00196    |
| 33  | CD38        | 2.508       | 0.000296           | 0.0106     |

|    |          |       |            |            |
|----|----------|-------|------------|------------|
| 34 | IGFBP7   | 2.481 | 2.46E-05   | 0.00258    |
| 35 | SPNS3    | 2.478 | 0.000357   | 0.0117     |
| 36 | RFX8     | 2.465 | 2.30E-05   | 0.00251    |
| 37 | JUP      | 2.439 | 2.00E-06   | 0.000601   |
| 38 | HAL      | 2.438 | 0.000145   | 0.00725    |
| 39 | C1orf186 | 2.433 | 2.60E-06   | 0.000683   |
| 40 | ETV6     | 2.362 | 3.06E-05   | 0.00296    |
| 41 | EAF2     | 2.307 | 0.000165   | 0.0077     |
| 42 | RAB32    | 2.278 | 0.000605   | 0.016      |
| 43 | TM7SF3   | 2.260 | 5.92E-05   | 0.00449    |
| 44 | MPL      | 2.237 | 0.000268   | 0.00992    |
| 45 | CXorf21  | 2.228 | 3.40E-06   | 0.000792   |
| 46 | CYP7B1   | 2.211 | 0.000501   | 0.0141     |
| 47 | DOCK5    | 2.204 | 0.000222   | 0.00897    |
| 48 | SLC15A2  | 2.171 | 2.43E-05   | 0.00256    |
| 49 | GUCY1A3  | 2.163 | 0.000864   | 0.02       |
| 50 | SPTLC3   | 2.160 | 0.000144   | 0.00725    |
| 51 | DOCK1    | 2.148 | 1.45E-05   | 0.00196    |
| 52 | TNFSF13B | 2.148 | 0.000152   | 0.00748    |
| 53 | GNA15    | 2.131 | 2.37E-05   | 0.00254    |
| 54 | DPY19L2  | 2.117 | 1.56E-05   | 0.00205    |
| 55 | TARBP1   | 2.116 | < 1.00E-07 | 0.00011    |
| 56 | ANKRD50  | 2.113 | 0.000273   | 0.0101     |
| 57 | B4GALT6  | 2.105 | 2.20E-06   | 0.000621   |
| 58 | ERG      | 2.097 | 0.000836   | 0.0196     |
| 59 | EBPL     | 2.075 | 9.30E-06   | 0.00147    |
| 60 | TNFRSF1A | 2.070 | 1.40E-06   | 0.000518   |
| 61 | MFAP4    | 2.063 | 1.00E-06   | 0.000414   |
| 62 | ME3      | 2.062 | 5.10E-06   | 0.00103    |
| 63 | MEIS1    | 2.059 | 0.000748   | 0.0183     |
| 64 | HOXA7    | 2.035 | 6.81E-05   | 0.00498    |
| 65 | SERPING1 | 2.034 | 0.000198   | 0.00844    |
| 66 | ZNF660   | 2.025 | < 1.00E-07 | < 1.00E-07 |
| 67 | LAIR1    | 2.024 | 0.000122   | 0.00671    |
| 68 | SCCPDH   | 2.022 | 0.000188   | 0.00819    |
| 69 | HEXA     | 2.020 | 4.23E-05   | 0.00358    |
| 70 | C3orf80  | 2.019 | 0.00098    | 0.0214     |



|     |            |       |          |         |
|-----|------------|-------|----------|---------|
| 71  | S100Z      | 2.018 | 0.000123 | 0.00674 |
| 72  | HOXA6      | 2.012 | 0.000207 | 0.00864 |
| 73  | RAVER2     | 2.003 | 0.000247 | 0.00956 |
| 74  | SLC9A7     | 2.003 | 9.61E-05 | 0.00587 |
| 75  | MKRN1      | 0.500 | 0.000235 | 0.0093  |
| 76  | CD160      | 0.497 | 2.17E-05 | 0.00241 |
| 77  | ASCC2      | 0.493 | 0.000243 | 0.00948 |
| 78  | BTLA       | 0.491 | 2.00E-05 | 0.00232 |
| 79  | POC1B      | 0.491 | 3.98E-05 | 0.00347 |
| 80  | MAP2K3     | 0.489 | 0.000478 | 0.0139  |
| 81  | ENDOD1     | 0.488 | 0.000159 | 0.0076  |
| 82  | MICALCL    | 0.488 | 0.000227 | 0.0091  |
| 83  | KLF3       | 0.487 | 0.000887 | 0.0203  |
| 84  | NCOA4      | 0.487 | 0.000319 | 0.0109  |
| 85  | PPM1A      | 0.487 | 4.36E-05 | 0.00366 |
| 86  | ACSL6      | 0.482 | 0.000118 | 0.00657 |
| 87  | CRTAM      | 0.479 | 8.20E-06 | 0.00136 |
| 88  | ST6GALNAC4 | 0.478 | 0.000883 | 0.0203  |
| 89  | CDR2       | 0.477 | 0.000331 | 0.0111  |
| 90  | RAD23A     | 0.475 | 0.000418 | 0.0127  |
| 91  | LGALS3     | 0.475 | 1.44E-05 | 0.00196 |
| 92  | CARM1      | 0.475 | 7.52E-05 | 0.00514 |
| 93  | DENND4A    | 0.474 | 0.000182 | 0.00801 |
| 94  | SLAMF1     | 0.473 | 0.000106 | 0.00619 |
| 95  | CD48       | 0.469 | 0.000853 | 0.0198  |
| 96  | MARCH3     | 0.468 | 0.000316 | 0.0109  |
| 97  | USP15      | 0.466 | 0.000298 | 0.0106  |
| 98  | TMEM57     | 0.465 | 0.000594 | 0.0159  |
| 99  | PTPN4      | 0.464 | 7.20E-06 | 0.00127 |
| 100 | RNF123     | 0.464 | 0.000462 | 0.0137  |
| 101 | LY9        | 0.462 | 1.96E-05 | 0.00228 |
| 102 | ANKRD9     | 0.461 | 0.000361 | 0.0117  |
| 103 | SAMD3      | 0.459 | 0.000143 | 0.00725 |
| 104 | HK1        | 0.458 | 9.35E-05 | 0.00576 |
| 105 | CTLA4      | 0.454 | 0.000677 | 0.0171  |
| 106 | AIDA       | 0.451 | 0.000183 | 0.00806 |
| 107 | WDR26      | 0.450 | 1.82E-05 | 0.0022  |

|     |          |       |          |          |
|-----|----------|-------|----------|----------|
| 108 | ARL4A    | 0.445 | 0.000241 | 0.00947  |
| 109 | S1PR5    | 0.445 | 0.000675 | 0.0171   |
| 110 | SUCLG2   | 0.443 | 2.42E-05 | 0.00256  |
| 111 | CCDC109B | 0.441 | 0.00061  | 0.0161   |
| 112 | SPOCK2   | 0.441 | 0.00058  | 0.0156   |
| 113 | TUBB2A   | 0.437 | 0.000507 | 0.0143   |
| 114 | LCK      | 0.437 | 0.0005   | 0.0141   |
| 115 | ELL2     | 0.437 | 0.000195 | 0.00839  |
| 116 | IL32     | 0.434 | 0.000242 | 0.00947  |
| 117 | SOX6     | 0.432 | 0.000994 | 0.0216   |
| 118 | EOMES    | 0.432 | 5.10E-06 | 0.00103  |
| 119 | PPME1    | 0.432 | 0.000647 | 0.0166   |
| 120 | TRIM23   | 0.429 | 2.42E-05 | 0.00256  |
| 121 | DNAJC6   | 0.424 | 0.000317 | 0.0109   |
| 122 | DCUN1D1  | 0.422 | 0.000918 | 0.0208   |
| 123 | FAM210B  | 0.420 | 0.000612 | 0.0161   |
| 124 | DPP4     | 0.420 | 0.000614 | 0.0161   |
| 125 | SLC1A5   | 0.418 | 0.000724 | 0.0179   |
| 126 | ADIPOR1  | 0.417 | 0.000196 | 0.00839  |
| 127 | CCR4     | 0.416 | 0.000498 | 0.0141   |
| 128 | STAT4    | 0.413 | 0.000177 | 0.00793  |
| 129 | RNF14    | 0.412 | 3.30E-06 | 0.000789 |
| 130 | GPRIN3   | 0.411 | 0.000833 | 0.0196   |
| 131 | PCGF5    | 0.410 | 2.20E-06 | 0.000621 |
| 132 | GPR15    | 0.408 | 0.00061  | 0.0161   |
| 133 | SEC62    | 0.407 | 1.44E-05 | 0.00196  |
| 134 | CAMK4    | 0.407 | 0.000316 | 0.0109   |
| 135 | CAPRIN2  | 0.406 | 0.000965 | 0.0213   |
| 136 | TMEM63B  | 0.406 | 9.40E-05 | 0.00576  |
| 137 | NELL2    | 0.404 | 0.000538 | 0.0149   |
| 138 | FOXO3    | 0.401 | 4.10E-05 | 0.00352  |
| 139 | CDC34    | 0.401 | 3.72E-05 | 0.00333  |
| 140 | CLCN3    | 0.401 | 0.000388 | 0.0121   |
| 141 | GPR18    | 0.400 | 0.000554 | 0.0152   |
| 142 | CISD2    | 0.399 | 0.000665 | 0.0169   |
| 143 | OPTN     | 0.398 | 0.000479 | 0.0139   |
| 144 | WNK1     | 0.396 | 0.000839 | 0.0196   |

|     |         |       |          |          |
|-----|---------|-------|----------|----------|
| 145 | CD247   | 0.395 | 0.000323 | 0.011    |
| 146 | C9orf78 | 0.393 | 8.58E-05 | 0.00557  |
| 147 | KLF12   | 0.392 | 0.000846 | 0.0197   |
| 148 | IL6ST   | 0.392 | 2.16E-05 | 0.00241  |
| 149 | PSME4   | 0.390 | 0.000107 | 0.00619  |
| 150 | UBE2H   | 0.383 | 1.17E-05 | 0.00174  |
| 151 | PRDM1   | 0.383 | 0.000814 | 0.0193   |
| 152 | MYO1D   | 0.381 | 3.00E-07 | 0.000193 |
| 153 | SAMD9   | 0.381 | 0.000116 | 0.0065   |
| 154 | SKAP1   | 0.379 | 0.000171 | 0.00777  |
| 155 | PIP4K2A | 0.378 | 3.68E-05 | 0.00331  |
| 156 | KLRC2   | 0.378 | 3.43E-05 | 0.0032   |
| 157 | RNF11   | 0.378 | 9.00E-07 | 0.000414 |
| 158 | ABCD2   | 0.375 | 1.59E-05 | 0.00207  |
| 159 | GIMAP7  | 0.375 | 0.000957 | 0.0212   |
| 160 | SH2D1B  | 0.374 | 0.000924 | 0.0209   |
| 161 | KLRG1   | 0.374 | 0.000475 | 0.0139   |
| 162 | NEDD4L  | 0.373 | 2.14E-05 | 0.0024   |
| 163 | BCL11B  | 0.370 | 0.000632 | 0.0164   |
| 164 | EPB41   | 0.370 | 0.000282 | 0.0103   |
| 165 | FAXDC2  | 0.367 | 0.000939 | 0.021    |
| 166 | BIRC3   | 0.364 | 0.000529 | 0.0147   |
| 167 | SLFN12L | 0.363 | 5.36E-05 | 0.00415  |
| 168 | SGPP1   | 0.362 | 0.00018  | 0.00795  |
| 169 | ATG14   | 0.359 | 0.000127 | 0.00684  |
| 170 | SLFN5   | 0.359 | 0.000638 | 0.0165   |
| 171 | NCEH1   | 0.356 | 0.000368 | 0.0118   |
| 172 | CPEB4   | 0.355 | 0.000195 | 0.00839  |
| 173 | DTHD1   | 0.347 | 3.11E-05 | 0.00297  |
| 174 | MXI1    | 0.344 | 0.000242 | 0.00947  |
| 175 | TERF2IP | 0.340 | 4.18E-05 | 0.00357  |
| 176 | KDM7A   | 0.340 | 9.70E-06 | 0.00152  |
| 177 | KAT2B   | 0.337 | 0.000114 | 0.00646  |
| 178 | THEMIS  | 0.335 | 4.00E-05 | 0.00347  |
| 179 | GPR171  | 0.334 | 4.81E-05 | 0.00394  |
| 180 | CD28    | 0.332 | 0.000386 | 0.0121   |
| 181 | MYBL1   | 0.332 | 9.40E-05 | 0.00576  |

|     |         |       |          |          |
|-----|---------|-------|----------|----------|
| 182 | PIM1    | 0.328 | 0.00018  | 0.00795  |
| 183 | SLC6A8  | 0.326 | 0.000978 | 0.0214   |
| 184 | SLC6A19 | 0.325 | 0.000759 | 0.0185   |
| 185 | GRAP2   | 0.323 | 1.50E-06 | 0.000518 |
| 186 | ETS1    | 0.320 | 3.49E-05 | 0.00322  |
| 187 | RASGRP1 | 0.319 | 8.88E-05 | 0.00562  |
| 188 | CCNDBP1 | 0.319 | 2.40E-06 | 0.000658 |
| 189 | ERAP2   | 0.317 | 0.000641 | 0.0166   |
| 190 | RBM38   | 0.316 | 0.000122 | 0.0067   |
| 191 | FCRL6   | 0.314 | 0.000712 | 0.0178   |
| 192 | XPO7    | 0.313 | 0.000729 | 0.018    |
| 193 | UTS2    | 0.313 | 0.000295 | 0.0106   |
| 194 | ABCG2   | 0.312 | 0.000109 | 0.00622  |
| 195 | USP12   | 0.312 | 4.27E-05 | 0.0036   |
| 196 | PITHD1  | 0.312 | 0.000249 | 0.0096   |
| 197 | FCRL3   | 0.310 | 3.37E-05 | 0.00317  |
| 198 | CD3E    | 0.310 | 0.000212 | 0.0087   |
| 199 | ICOS    | 0.309 | 0.000769 | 0.0185   |
| 200 | P2RY10  | 0.308 | 0.000191 | 0.00827  |
| 201 | PYHIN1  | 0.308 | 0.000283 | 0.0103   |
| 202 | TMCC2   | 0.307 | 6.44E-05 | 0.00478  |
| 203 | KIR2DL3 | 0.301 | 0.000734 | 0.018    |
| 204 | E2F2    | 0.299 | 2.77E-05 | 0.00281  |
| 205 | RORA    | 0.299 | 5.80E-06 | 0.0011   |
| 206 | MS4A1   | 0.298 | 0.000987 | 0.0215   |
| 207 | SESN3   | 0.298 | 2.11E-05 | 0.00238  |
| 208 | TRAT1   | 0.296 | 3.00E-06 | 0.000746 |
| 209 | SYNE2   | 0.295 | 0.000124 | 0.00676  |
| 210 | YOD1    | 0.293 | 1.65E-05 | 0.00211  |
| 211 | TC2N    | 0.292 | 4.21E-05 | 0.00358  |
| 212 | GPR174  | 0.292 | 0.000159 | 0.0076   |
| 213 | UBE2O   | 0.292 | 7.80E-05 | 0.00527  |
| 214 | CD3D    | 0.291 | 3.40E-05 | 0.00318  |
| 215 | TCP11L2 | 0.291 | 7.31E-05 | 0.0051   |
| 216 | KLRC3   | 0.278 | 6.56E-05 | 0.00485  |
| 217 | CD2     | 0.272 | 0.000228 | 0.0091   |
| 218 | HBM     | 0.271 | 0.000645 | 0.0166   |

|     |             |       |          |          |
|-----|-------------|-------|----------|----------|
| 219 | IKZF3       | 0.270 | 0.000108 | 0.00622  |
| 220 | GSPT1       | 0.269 | 1.77E-05 | 0.00218  |
| 221 | MMD         | 0.268 | 4.77E-05 | 0.00394  |
| 222 | CCL5        | 0.267 | 0.000132 | 0.00698  |
| 223 | LCN2        | 0.267 | 0.000368 | 0.0118   |
| 224 | KLRF1       | 0.264 | 0.00094  | 0.021    |
| 225 | ITK         | 0.257 | 0.000103 | 0.00608  |
| 226 | RIOK3       | 0.256 | 1.30E-06 | 0.000505 |
| 227 | CD226       | 0.254 | 9.32E-05 | 0.00576  |
| 228 | BPGM        | 0.252 | 5.31E-05 | 0.00415  |
| 229 | HEMGN       | 0.249 | 0.00094  | 0.021    |
| 230 | SLC25A39    | 0.246 | 0.000204 | 0.00856  |
| 231 | MBNL3       | 0.244 | 4.43E-05 | 0.0037   |
| 232 | PLBD1       | 0.244 | 7.76E-05 | 0.00526  |
| 233 | CD3G        | 0.241 | 0.000514 | 0.0144   |
| 234 | KLRD1       | 0.237 | 7.13E-05 | 0.00504  |
| 235 | GYPB        | 0.236 | 0.000575 | 0.0156   |
| 236 | FECH        | 0.235 | 0.00031  | 0.0107   |
| 237 | SNCA        | 0.228 | 0.000269 | 0.00994  |
| 238 | SLAMF6      | 0.221 | 7.85E-05 | 0.00528  |
| 239 | GZMK        | 0.219 | 5.70E-06 | 0.0011   |
| 240 | DCAF12      | 0.216 | 0.000139 | 0.00719  |
| 241 | GYPE        | 0.216 | 0.000805 | 0.0191   |
| 242 | SLFN14      | 0.215 | 0.000218 | 0.00888  |
| 243 | FHDC1       | 0.212 | 0.000622 | 0.0162   |
| 244 | STRADB      | 0.204 | 0.000128 | 0.00684  |
| 245 | GZMA        | 0.202 | 3.96E-05 | 0.00347  |
| 246 | GMPR        | 0.198 | 0.000138 | 0.00717  |
| 247 | SLC14A1     | 0.197 | 0.000655 | 0.0168   |
| 248 | KLRC4-KLRK1 | 0.192 | 9.30E-06 | 0.00147  |
| 249 | TUBB1       | 0.165 | 0.000766 | 0.0185   |
| 250 | IL7R        | 0.159 | 7.90E-06 | 0.00133  |
| 251 | PHOSPHO1    | 0.153 | 1.00E-06 | 0.000414 |
| 252 | FAM46C      | 0.151 | 4.40E-06 | 0.000954 |
| 253 | KLRB1       | 0.147 | 3.70E-06 | 0.000841 |
| 254 | RUNDC3A     | 0.143 | 1.50E-06 | 0.000518 |
| 255 | IFIT1B      | 0.115 | 0.000447 | 0.0134   |

**Supplementary Table S8. The KEGG (Kyoto Encyclopedia of Genes and Genomes) pathways associated with the 255 differentially expressed genes between the MDS patients with high and low lncRNA scores**

| Implicated KEGG Pathways                  | Gene Count | Nominal <i>P</i> Value | FDR             |
|-------------------------------------------|------------|------------------------|-----------------|
| <b>Hematopoietic cell lineage</b>         | <b>10</b>  | <b>1.20E-05</b>        | <b>1.00E-03</b> |
| <b>T cell receptor signaling pathway</b>  | <b>11</b>  | <b>8.30E-06</b>        | <b>1.40E-03</b> |
| Primary immunodeficiency                  | 5          | 2.40E-03               | 1.30E-01        |
| Chagas disease (American trypanosomiasis) | 7          | 8.20E-03               | 3.00E-01        |
| Natural killer cell mediated cytotoxicity | 7          | 1.70E-02               | 3.90E-01        |
| Cytokine-cytokine receptor interaction    | 10         | 1.60E-02               | 4.30E-01        |
| HTLV-I infection                          | 10         | 2.90E-02               | 5.20E-01        |
| Cell adhesion molecules (CAMs)            | 7          | 3.30E-02               | 5.20E-01        |
| Malaria                                   | 4          | 5.00E-02               | 6.30E-01        |
| Dorso-ventral axis formation              | 3          | 7.60E-02               | 6.30E-01        |
| Acute myeloid leukemia                    | 4          | 6.90E-02               | 6.50E-01        |
| Measles                                   | 6          | 7.50E-02               | 6.50E-01        |
| Transcriptional misregulation in cancer   | 7          | 6.50E-02               | 6.60E-01        |
| Rheumatoid arthritis                      | 5          | 6.20E-02               | 6.70E-01        |
| Central carbon metabolism in cancer       | 4          | 9.40E-02               | 6.80E-01        |

**Supplementary Figure S1:**

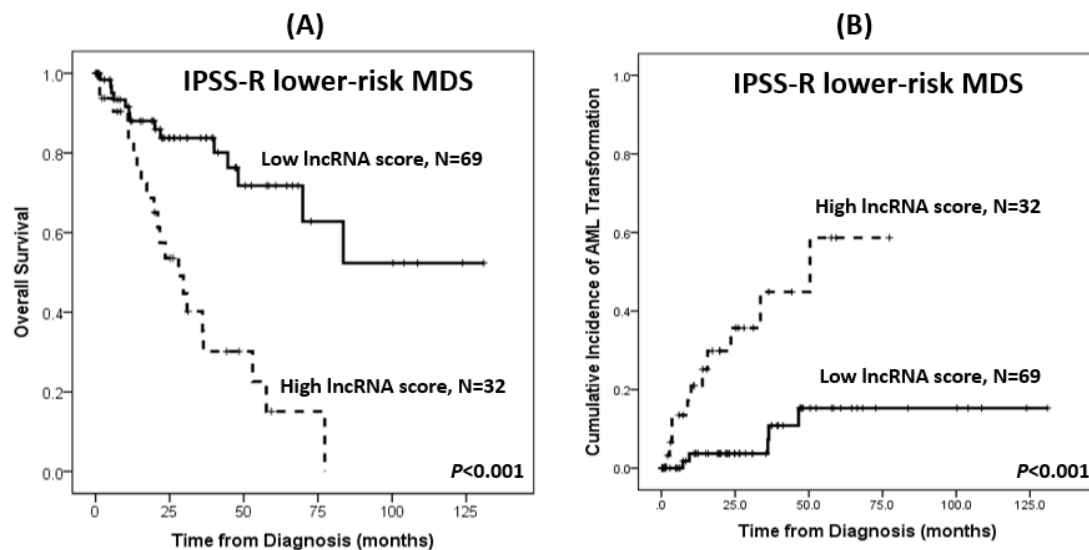

**Supplementary Figure S1 Legend:**

Kaplan-Meier plots of OS (A) and cumulative incidence of AML transformation (B) of the 101 MDS patients who had lower-risk IPSS-R (very low, low and intermediate risks) in the training cohort, stratified by lncRNA scores. Patients with higher lncRNA scores had worse clinical outcomes than those with lower scores.

**Supplementary Figure S2:**

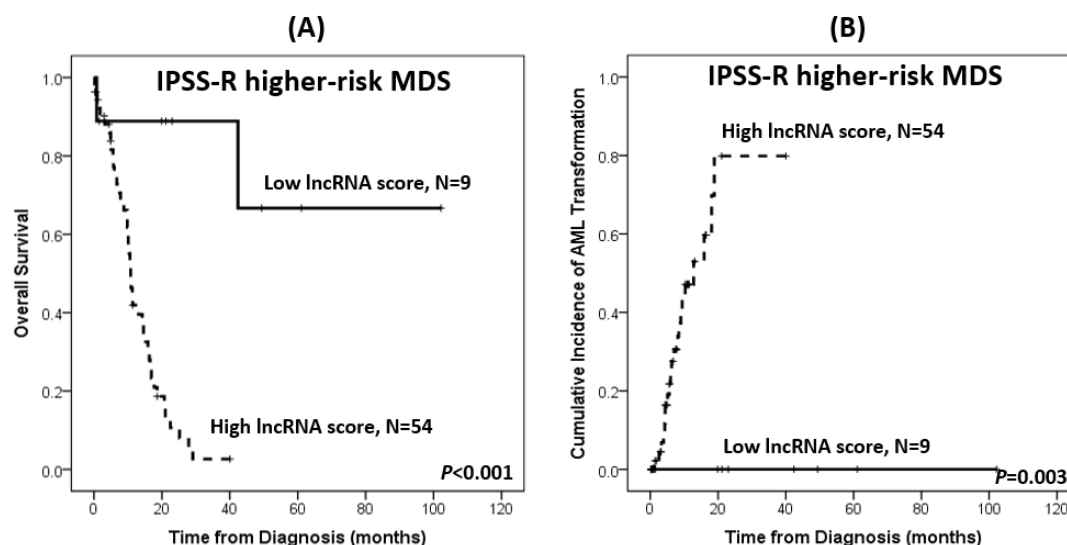

**Supplementary Figure S2 Legend:**

Kaplan-Meier plots of OS (A) and cumulative incidence of AML transformation (B) of the 63 MDS patients who had higher-risk IPSS-R (high and very high risks) in the training cohort, stratified by lncRNA scores. Patients with higher lncRNA scores had worse clinical outcomes than those with lower scores.



**Supplementary Figure S3:**

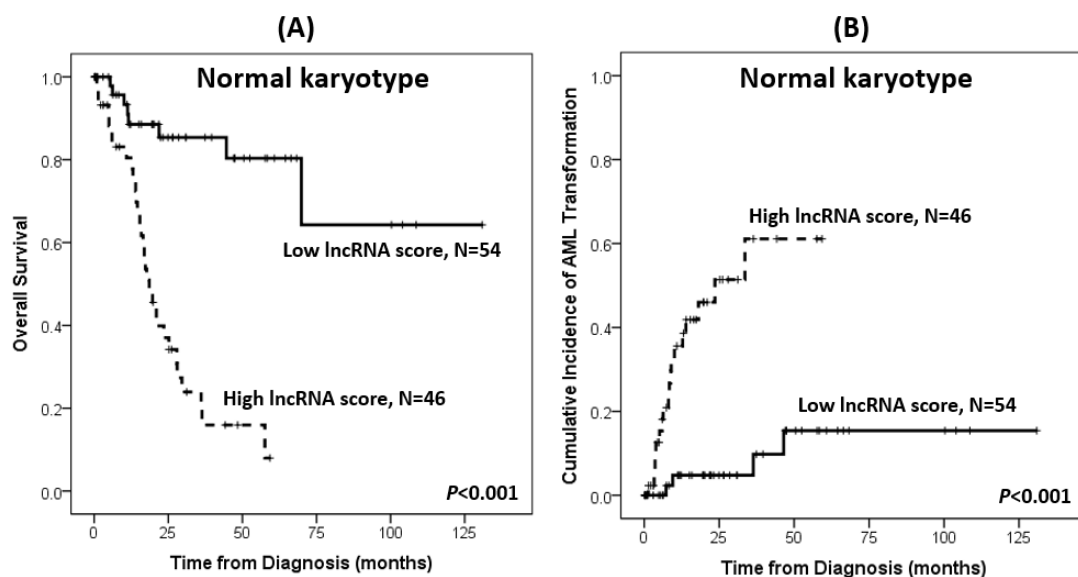

**Supplementary Figure S3 Legend:**

Kaplan-Meier plots of OS (A) and cumulative incidence of AML transformation (B) of the 100 MDS patients who had normal karyotype in the training cohort, stratified by lncRNA scores. Patients with higher lncRNA scores had worse clinical outcomes than those with lower scores.

**Supplementary Figure S4:**

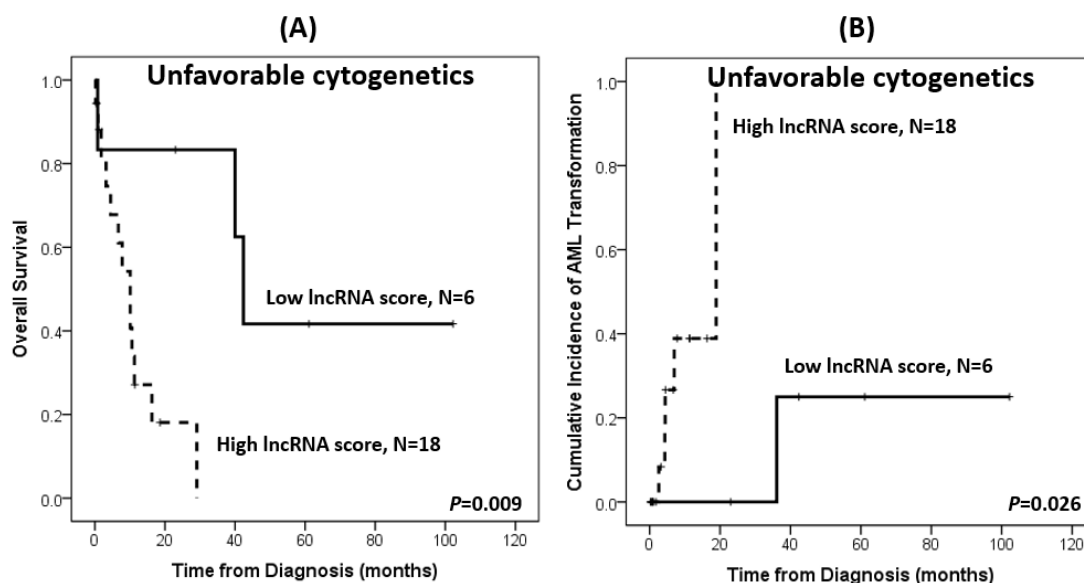

**Supplementary Figure S4 Legend:**

Kaplan-Meier plots of OS (A) and cumulative incidence of AML transformation (B) of the 24 MDS patients who had unfavorable cytogenetics in the training cohort, stratified by lncRNA scores. Patients with higher lncRNA scores had worse clinical outcomes than those with lower scores.

**Supplementary Figure S5:**

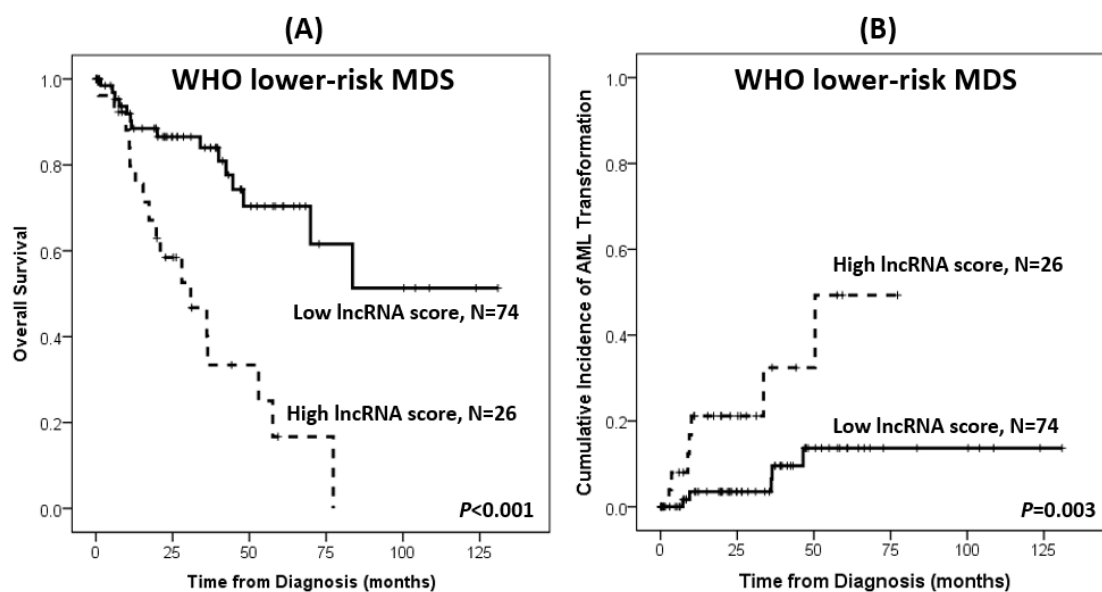

**Supplementary Figure S5 Legend:**

Kaplan-Meier plots of OS (A) and cumulative incidence of AML transformation (B) of the 100 MDS patients who had lower-risk WHO classifications (RCUD, RARS, RCMD, and RCMD-RS) in the training cohort, stratified by IncRNA scores. Patients with higher IncRNA scores had worse clinical outcomes than those with lower scores.

**Supplementary Figure S6:**

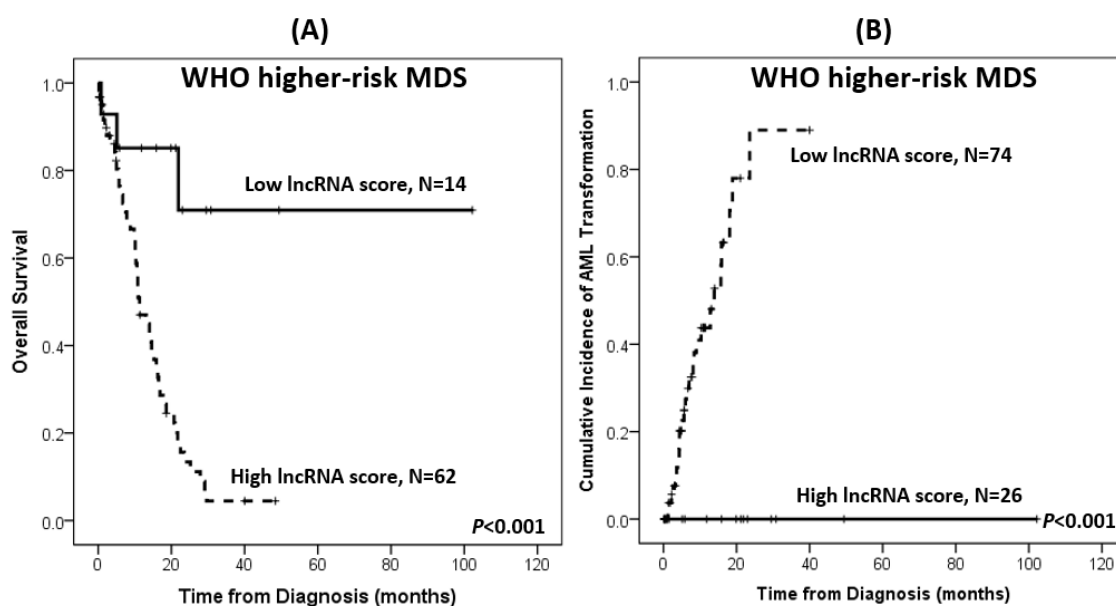

**Supplementary Figure S6 Legend:**

Kaplan-Meier plots of OS (A) and cumulative incidence of AML transformation (B) of the 76 MDS patients who had higher-risk WHO classifications (RAEB-1 and RAEB-2) in the training cohort, stratified by lncRNA scores. Patients with higher lncRNA scores had worse clinical outcomes than those with lower scores.

**Supplementary Figure S7:**

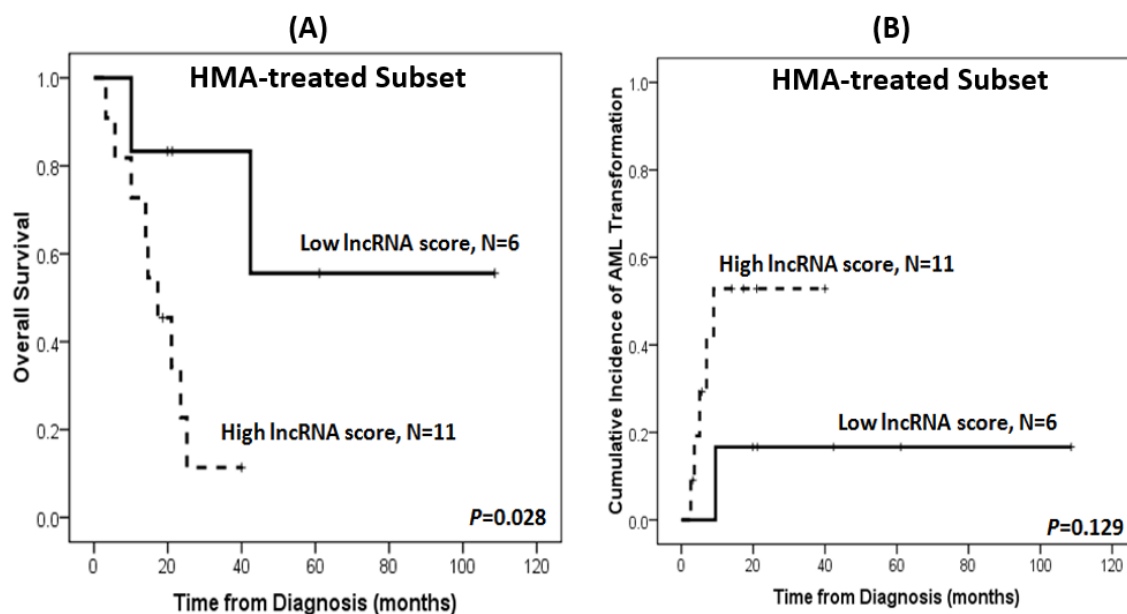

**Supplementary Figure S7 Legend:**

Kaplan–Meier plots of OS (A) and cumulative incidence of AML transformation (B) of the 17 MDS patients in our training cohort who had received HMA treatment, stratified by lncRNA scores. Patients with higher lncRNA scores had statistically significant shorter median, along with a marginally higher incidence of projected AML transformation at five years, than those with lower scores. (Median OS: 17.3 months vs. NR,  $P=0.028$ ; AML transformation rate at five years: 52.9% vs. 16.7%,  $P=0.129$ )

(Please note: Although HMAs have become the mainstay treatment for high-risk MDS patients since the results of the AZA-001 trials had been published in 2009, in Taiwan, the national reimbursement of azacitidine only started after year 2013. Therefore, as most of the patients' samples in this retrospective cohort of 176 adult primary MDS patients were collected at time points (November 1992 ~ December 2010) earlier than the widespread use of azacitidine in Taiwan, most of the patients did not have access to this medication. Only few patients who were economically self-sufficient could afford azacitidine treatment back then. So, in this cohort of 176 patients, only 17 of them had received azacitidine treatment.)

**Supplementary Figure S8:**

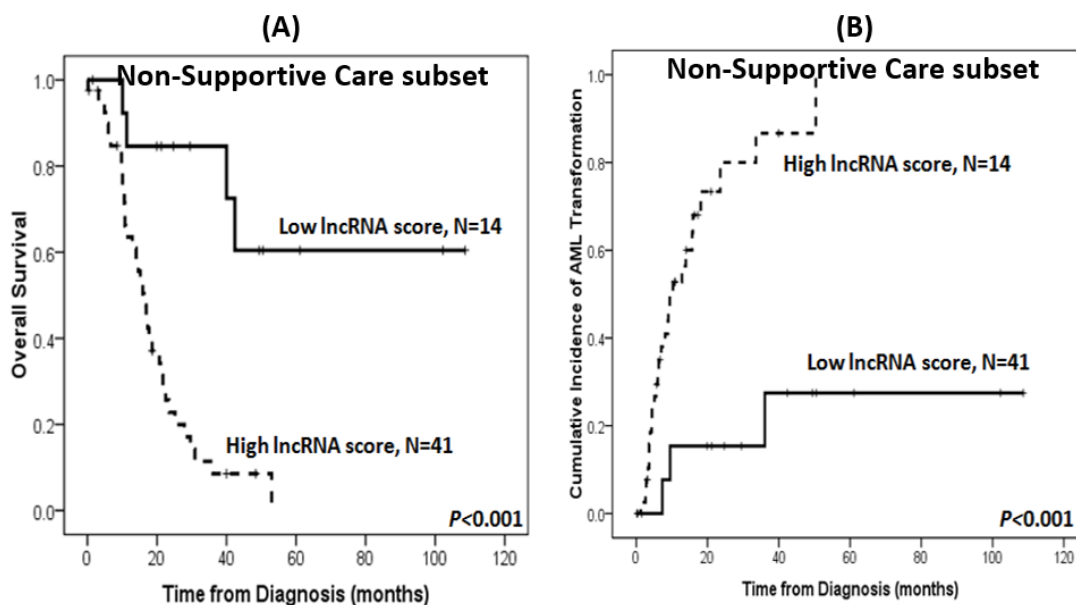

**Supplementary Figure S8 Legend:**

Kaplan–Meier plots of OS (A) and cumulative incidence of AML transformation (B) of the 55 non-supportive care MDS patients in our training cohort, stratified by lncRNA scores. Patients with higher lncRNA scores had worse clinical outcomes than those with lower scores. (Median OS: 16.3 months vs. NR,  $P < 0.001$ ; AML transformation rate at five years: 100.0% vs. 27.5%,  $P < 0.001$ )

### Supplementary Figure S9:

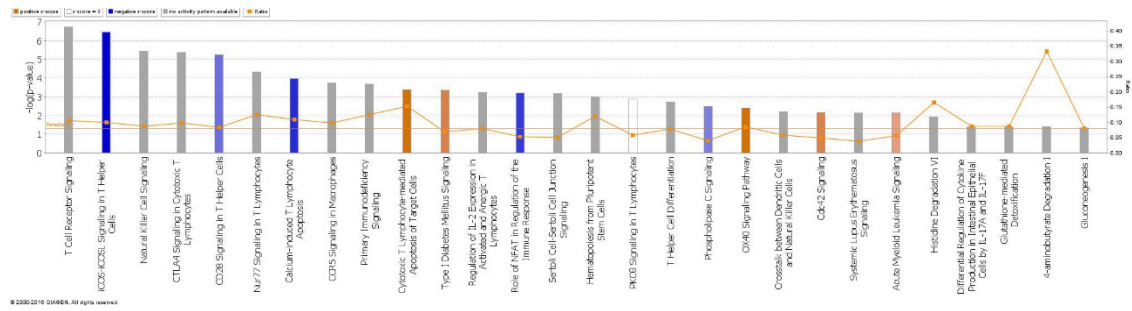

### Supplementary Figure S9 Legend:

The implicated IPA pathways associated the 255 differentially expressed genes between patients with the highest (>average +1 SD, n=22) and the lowest (< average - 1 SD, n=22) IncRNA risk scores.
